# Supplementary figures and images for: Host-selected mutations converging on a global regulator drive an adaptive leap towards symbiosis in bacteria
Source: eLife journal article supplement (doi:10.7554/elife.24414), 2017-04-27

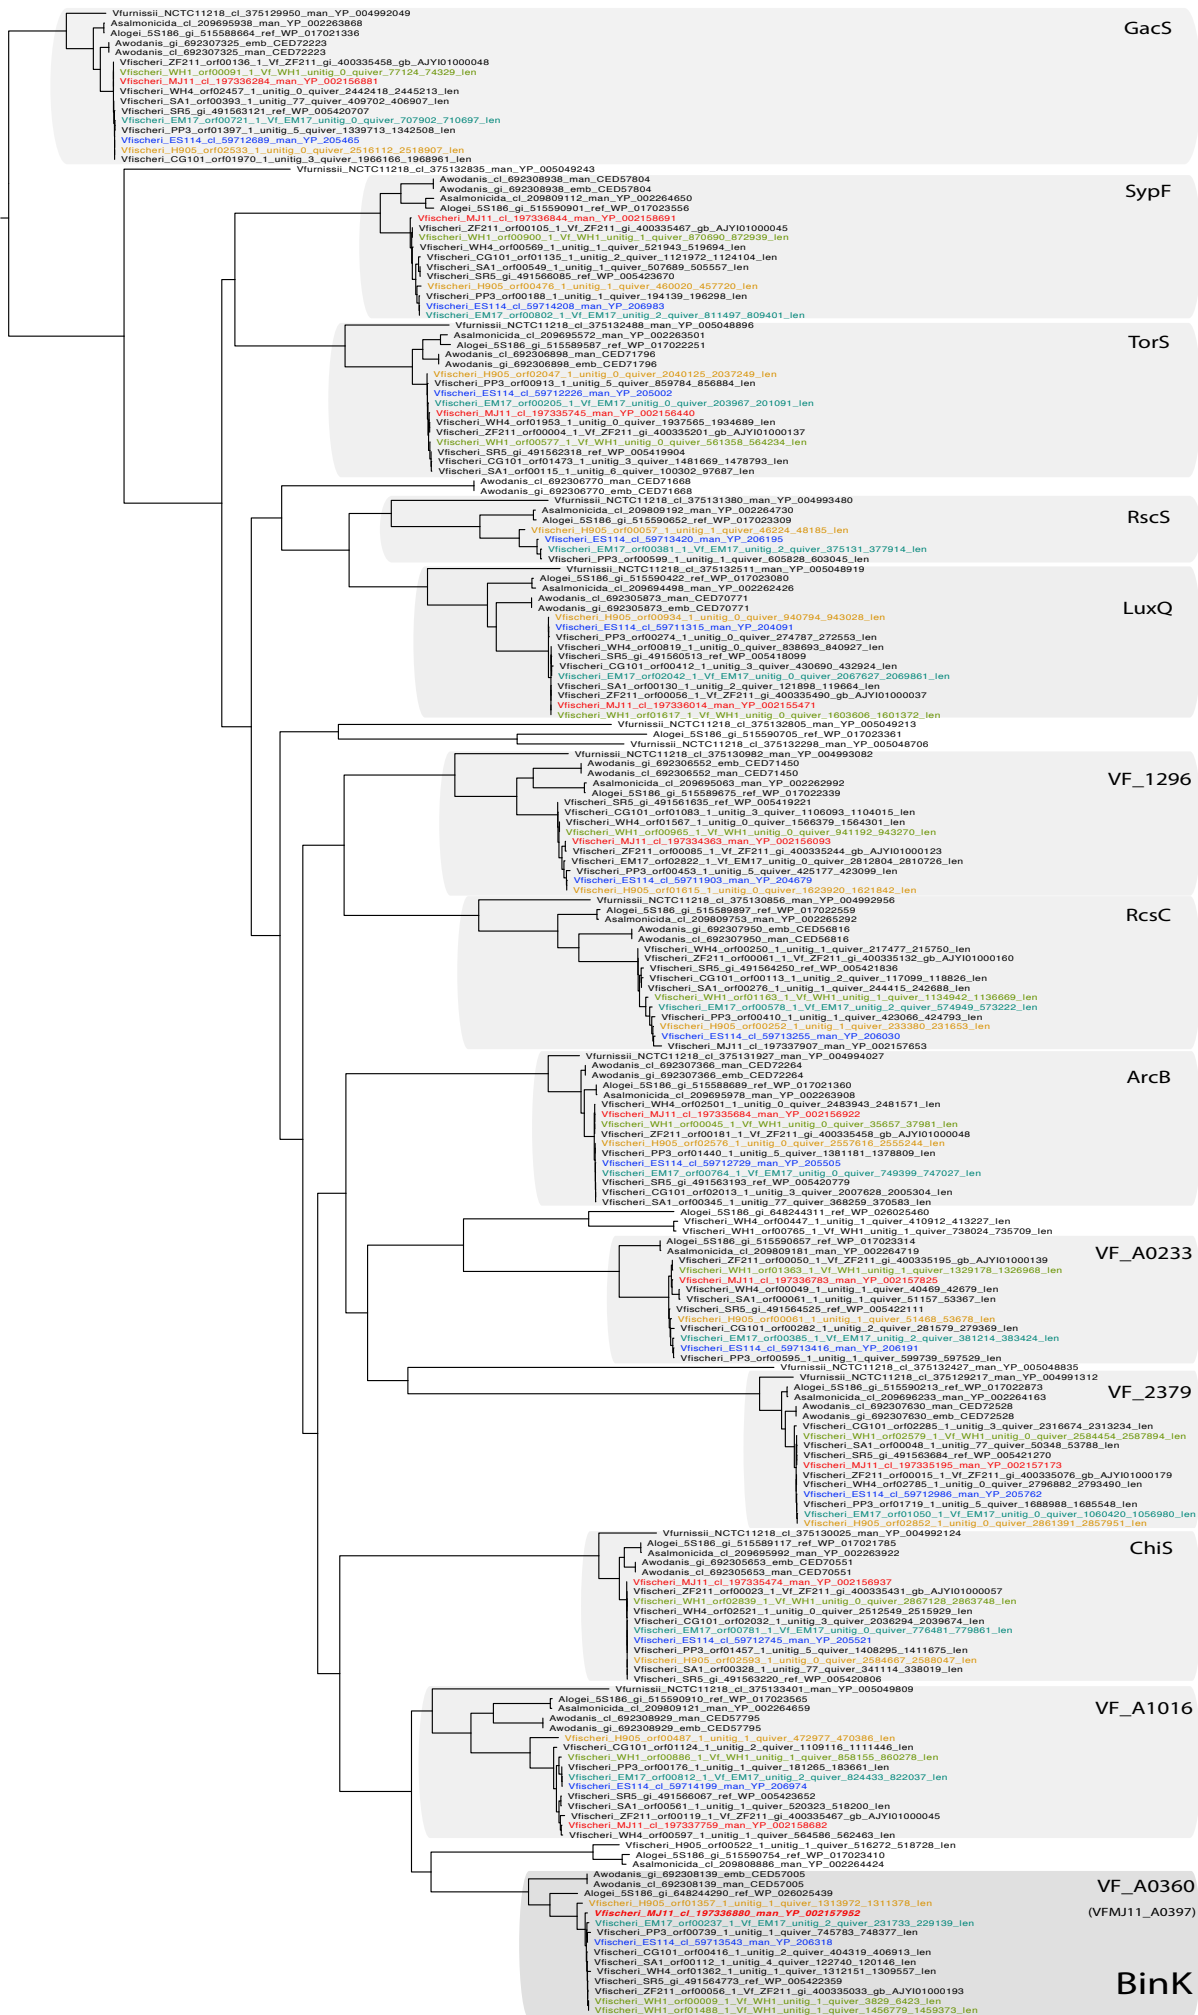

Supplement: supp [file elife_poa_e24414_Figure_2_figure_Supplement_1.pdf › elife_poa_e24414_Figure_2_figure_Supplement_1.pdf]

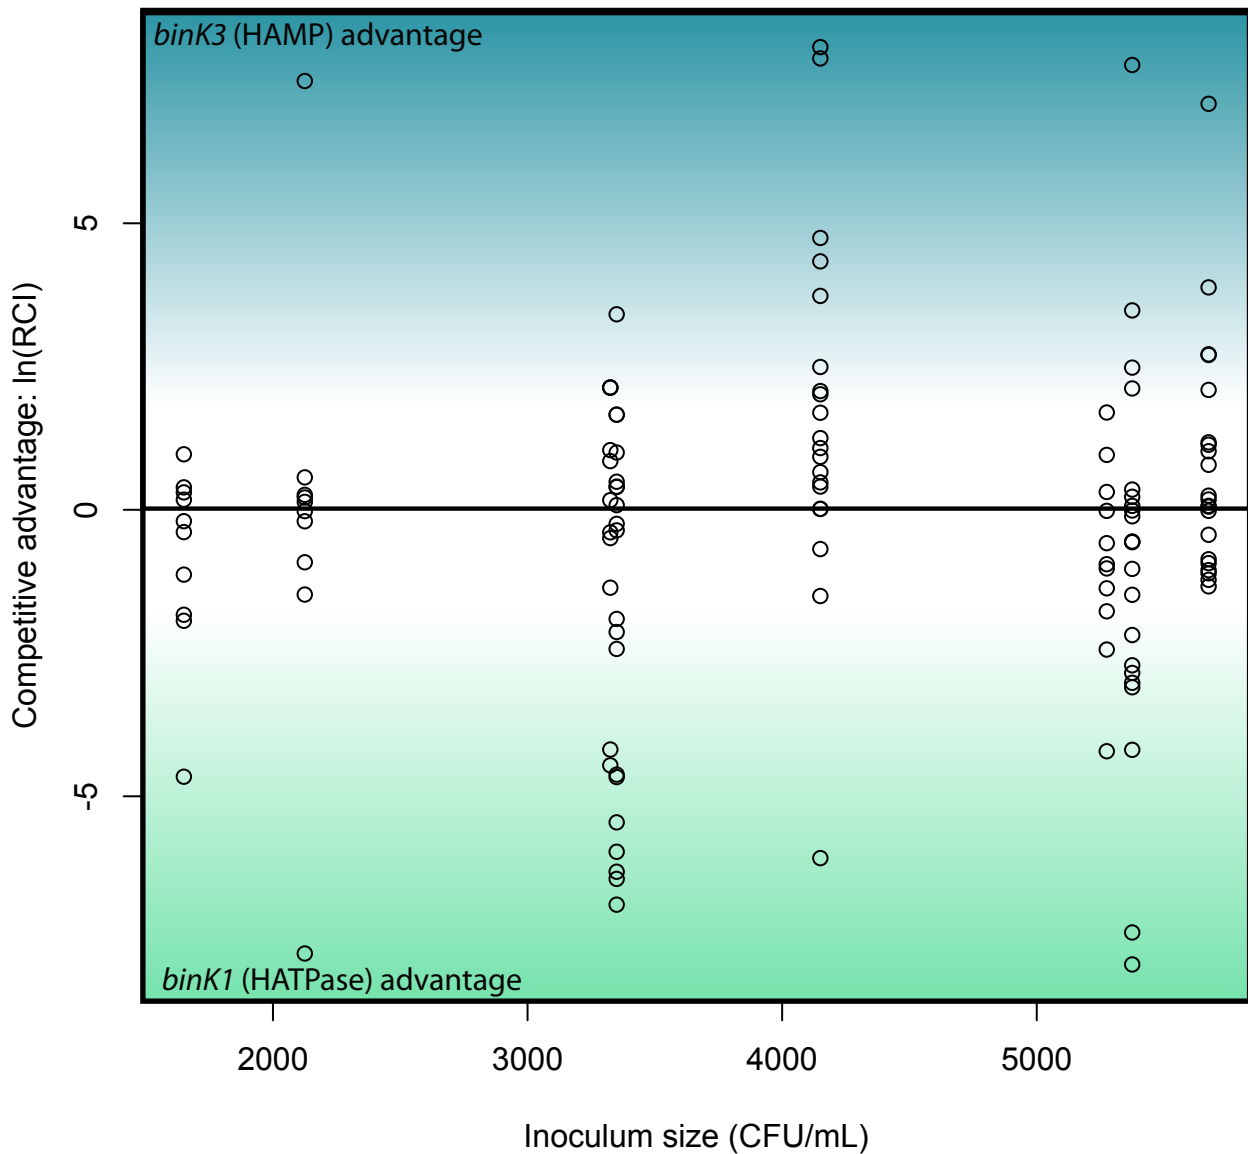

Supplement: supp [file elife_poa_e24414_Figure_3_figure_Supplement_1.pdf › elife_poa_e24414_Figure_3_figure_Supplement_1.pdf]

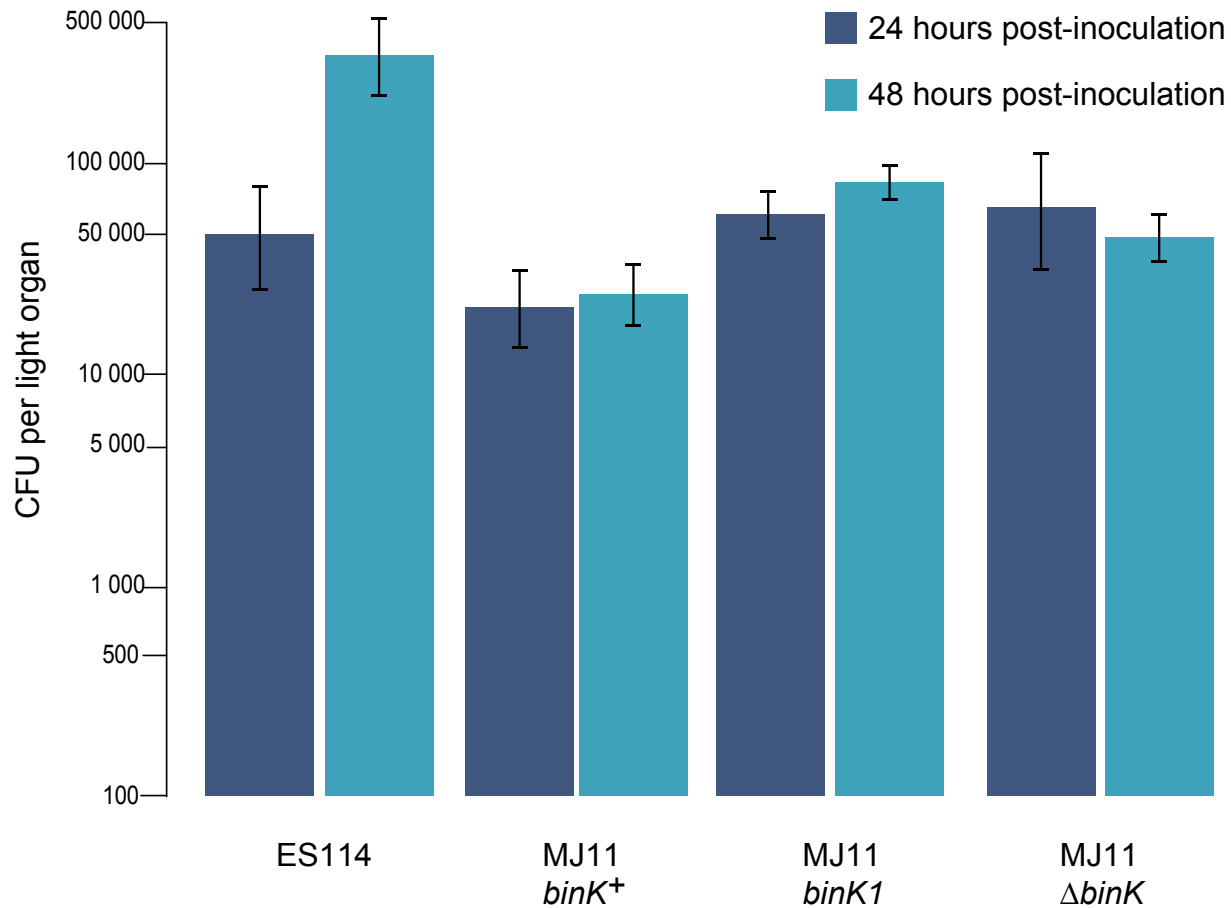

Supplement: supp [file elife_poa_e24414_Figure_3_figure_Supplement_2.pdf › elife_poa_e24414_Figure_3_figure_Supplement_2.pdf]

**A**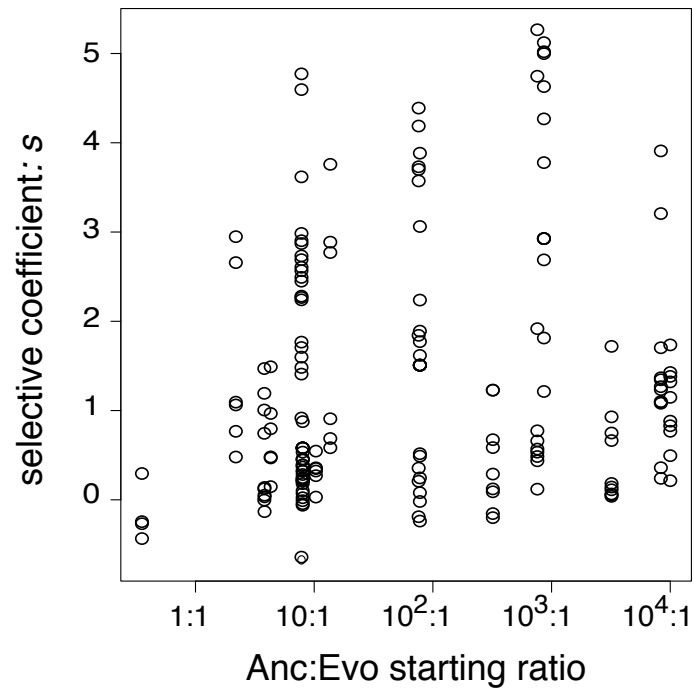**B**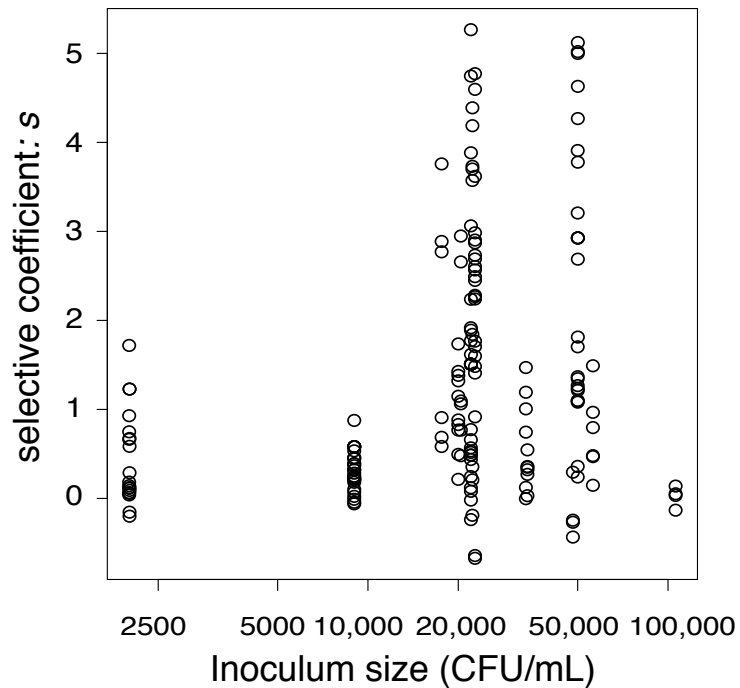

Supplement: supp [file elife_poa_e24414_Figure_4_figure_supplement_1.pdf › elife_poa_e24414_Figure_4_figure_supplement_1.pdf]

MJ11 ancestor (*binK*<sup>+</sup>) +GFP

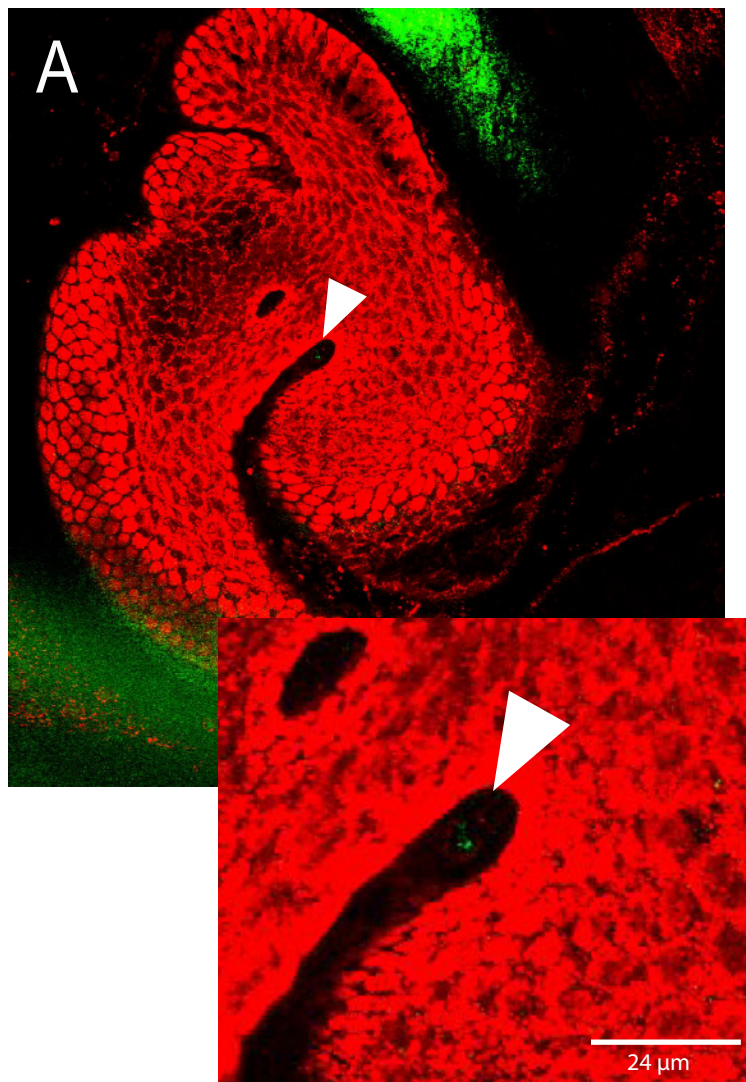

MJ11 evolved (*binK1*) +GFP

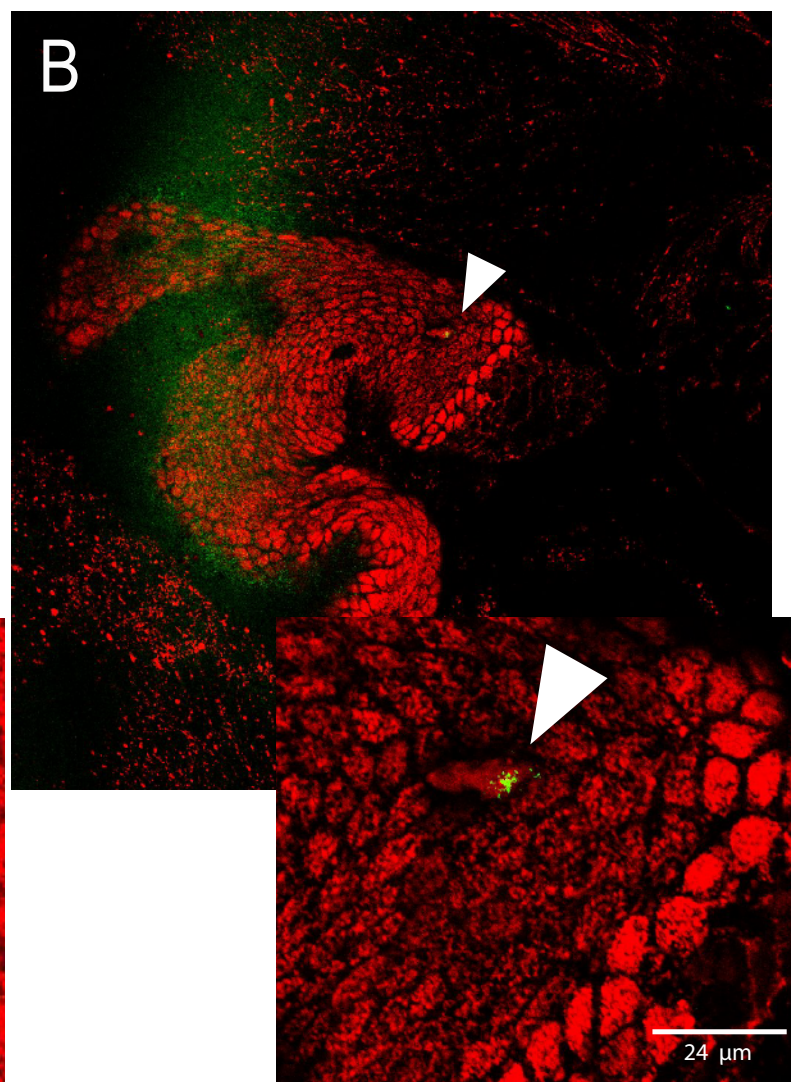

Supplement: supp [file elife_poa_e24414_Figure_5_figure_Supplement_1.pdf › elife_poa_e24414_Figure_5_figure_Supplement_1.pdf]

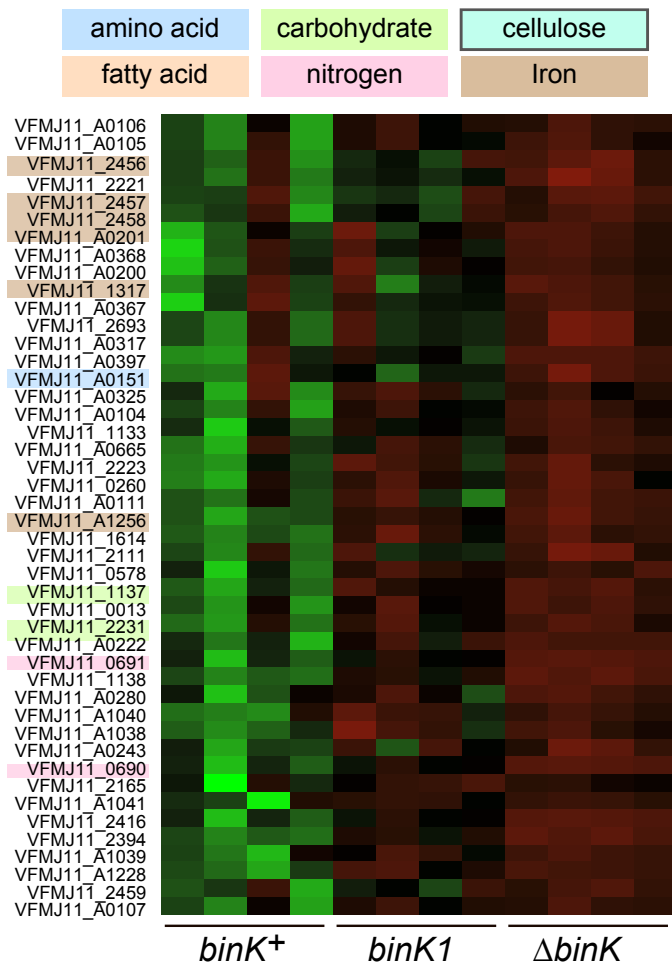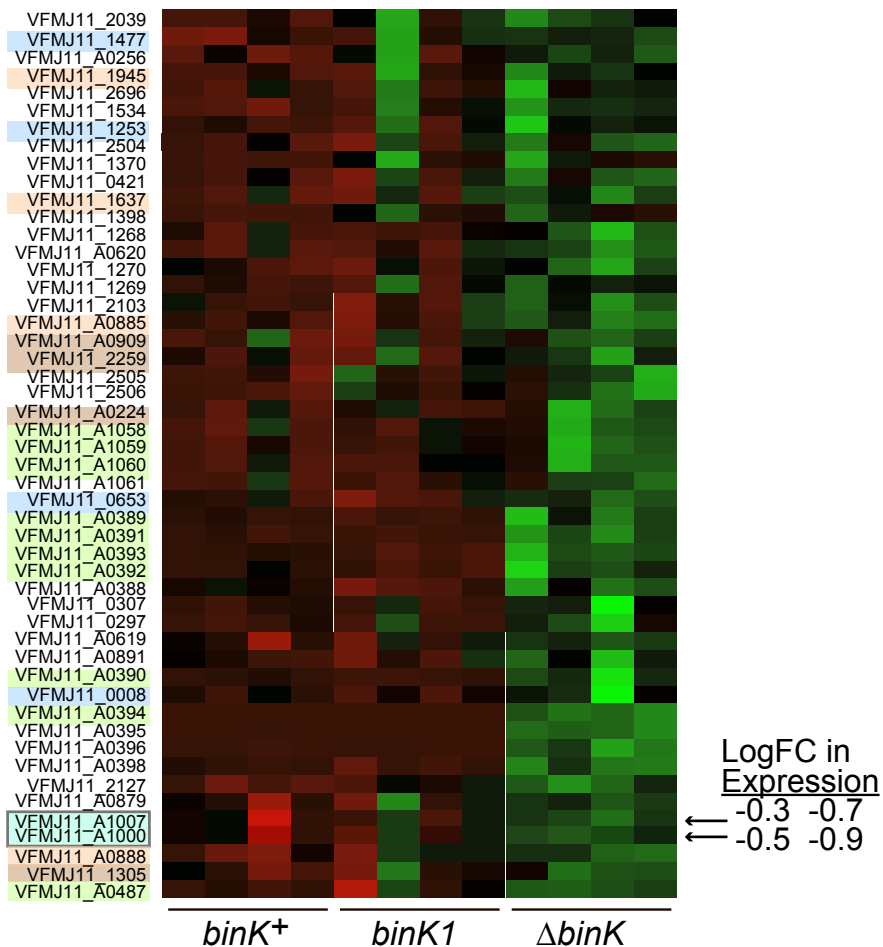

Supplement: supp [file elife_poa_e24414_Figure_5_figure_Supplement_2.pdf › elife_poa_e24414_Figure_5_figure_Supplement_2.pdf]

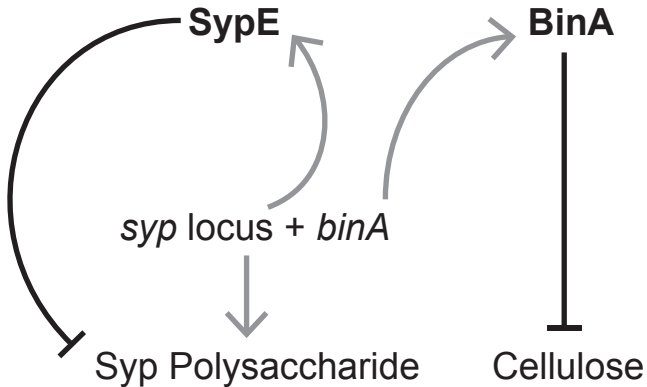

Supplement: supp [file elife_poa_e24414_Figure_5_figure_Supplement_3.pdf › elife_poa_e24414_Figure_5_figure_Supplement_3.pdf]

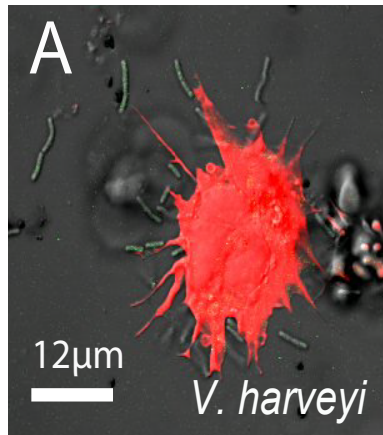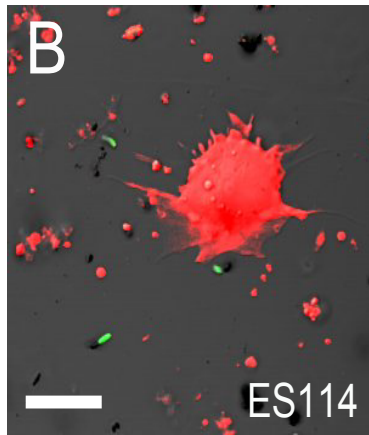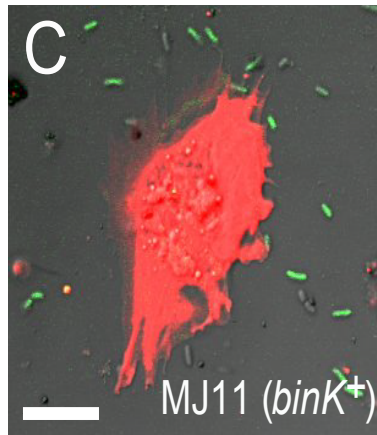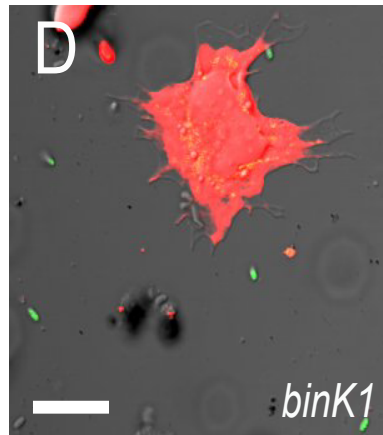

Supplement: supp [file elife_poa_e24414_Figure_6_figure_Supplement_1.pdf › elife_poa_e24414_Figure_6_figure_Supplement_1.pdf]
